# Supplementary material for: A green electrolysis of silver-decorated MoS2 nanocomposite with an enhanced antibacterial effect and low cytotoxicity
Source: Royal Society of Chemistry journal article supplement (doi:10.1039/d1na00100k), 2021-01-01
Supplement: d1na00100k1.pdf [file d1na00100k1.pdf]

## Supporting Information

### **Green electrolysis of silver decorated MoS<sub>2</sub> nanocomposite with enhanced antibacterial effect and low cytotoxicity**

Qilan Xu<sup>1#</sup>, Yuhui Liu<sup>2#</sup>, Ling Cai<sup>1#</sup>, Yue Cao<sup>3</sup>, Feng Chen<sup>3</sup>, Liuzhu Zhou<sup>1</sup>, Ping Zhu<sup>1</sup>,  
Huijun Jiang<sup>4</sup>, Qiao-Yan Jiang<sup>3</sup>, Yang Sun<sup>3</sup>, Jin Chen<sup>1,5\*</sup>

<sup>1</sup>Center for Global Health & The Key Laboratory of Modern Toxicology, Ministry of Education, School of Public Health, Nanjing Medical University, Nanjing 211166, China

<sup>2</sup>State Key Laboratory of Nuclear Resources and Environment, School of Nuclear Science and Engineering, East China University of Technology, Nanchang, 330013, China

<sup>3</sup>Department of Forensic Medicine, Nanjing Medical University, Nanjing, 211166, China

<sup>4</sup>School of Pharmacy, Nanjing Medical University, Nanjing 211166, China

<sup>5</sup>Jiangsu Province Engineering Research Center of Antibody Drug, Key Laboratory of Antibody Technique of National Health Commission, Nanjing Medical University, Nanjing 211166, China

<sup>#</sup>Equal contribution.

<sup>\*</sup>Corresponding author. Email: okachen30@gmail.com; jchen@njmu.edu.cn

Table S1. Counting Results (CFU) of *E.coli* and *S.aureus* cultured with different concentrations of materials from Figure 4a

| Group    | <i>E. coli</i> |      | <i>S. aureus</i> |      |
|----------|----------------|------|------------------|------|
|          | #6             | #5   | #6               | #5   |
| control  | 1024           | 1168 | 6500             | 4028 |
| 10 µg/mL | 1              | 7    | 528              | 747  |
| 20 µg/mL | 0              | 1    | 1                | 48   |
| 50 µg/mL | 0              | 0    | 1                | 4    |

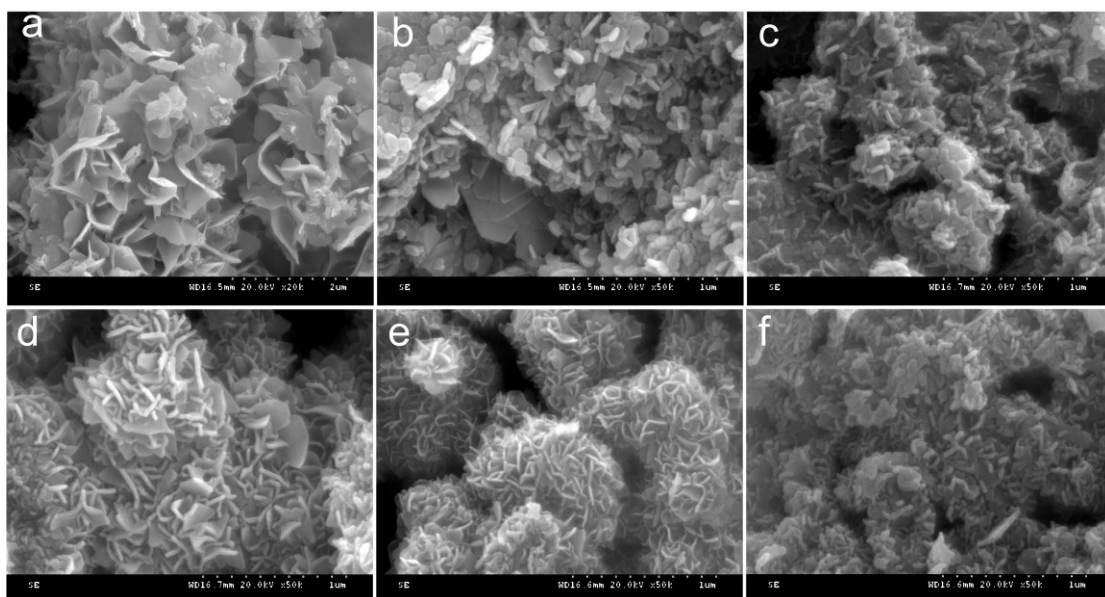

**Figure S1.** The SEM image of an Ag-doped MoS<sub>2</sub> nanosheets with the weight ratios of Ag of 1.5 % (a) , 2.15 % (b), 2.44 % (c), 2.56 % (d), 3.26 % (e), and 6.72 % (f).

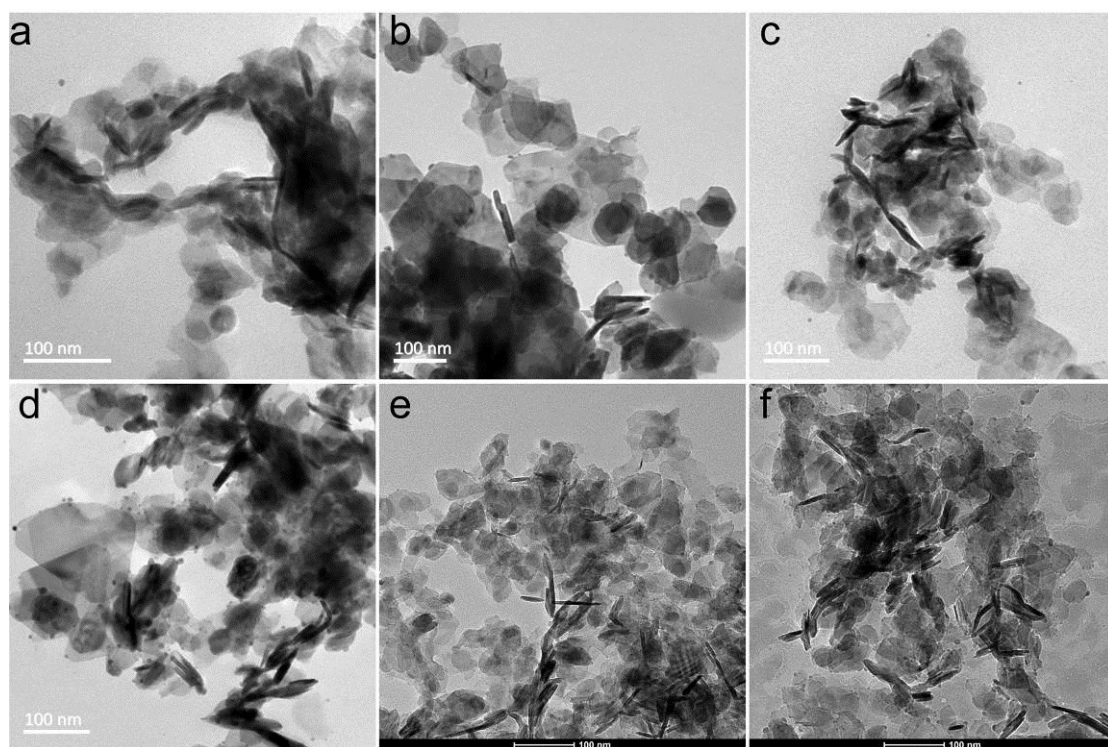

**Figure S2.** The TEM image of an Ag@MoS<sub>2</sub> nanosheets with Ag content ratios of 1.5 % (a), 2.15 % (b), 2.44 % (c), 2.56 % (d), 3.26 % (e), and 6.72 % (f).

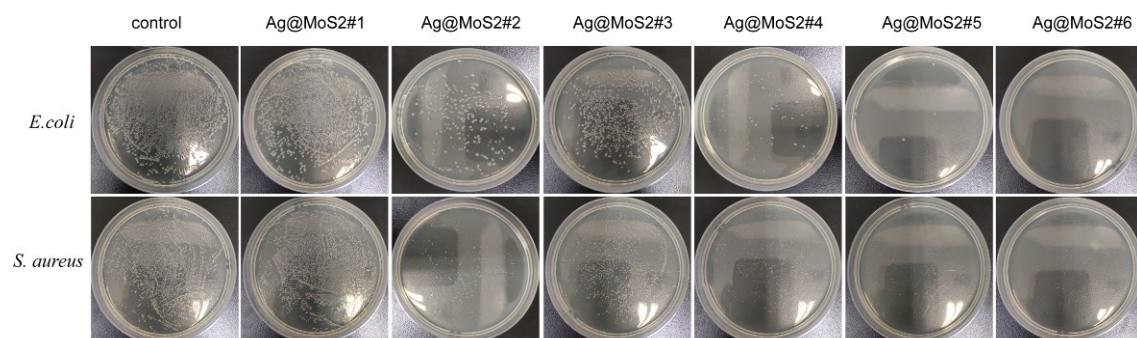

**Figure S3.** The optical images of *E. coli*, *S. aureus* incubated 4h with Ag@MoS<sub>2</sub> of 5μg/mL

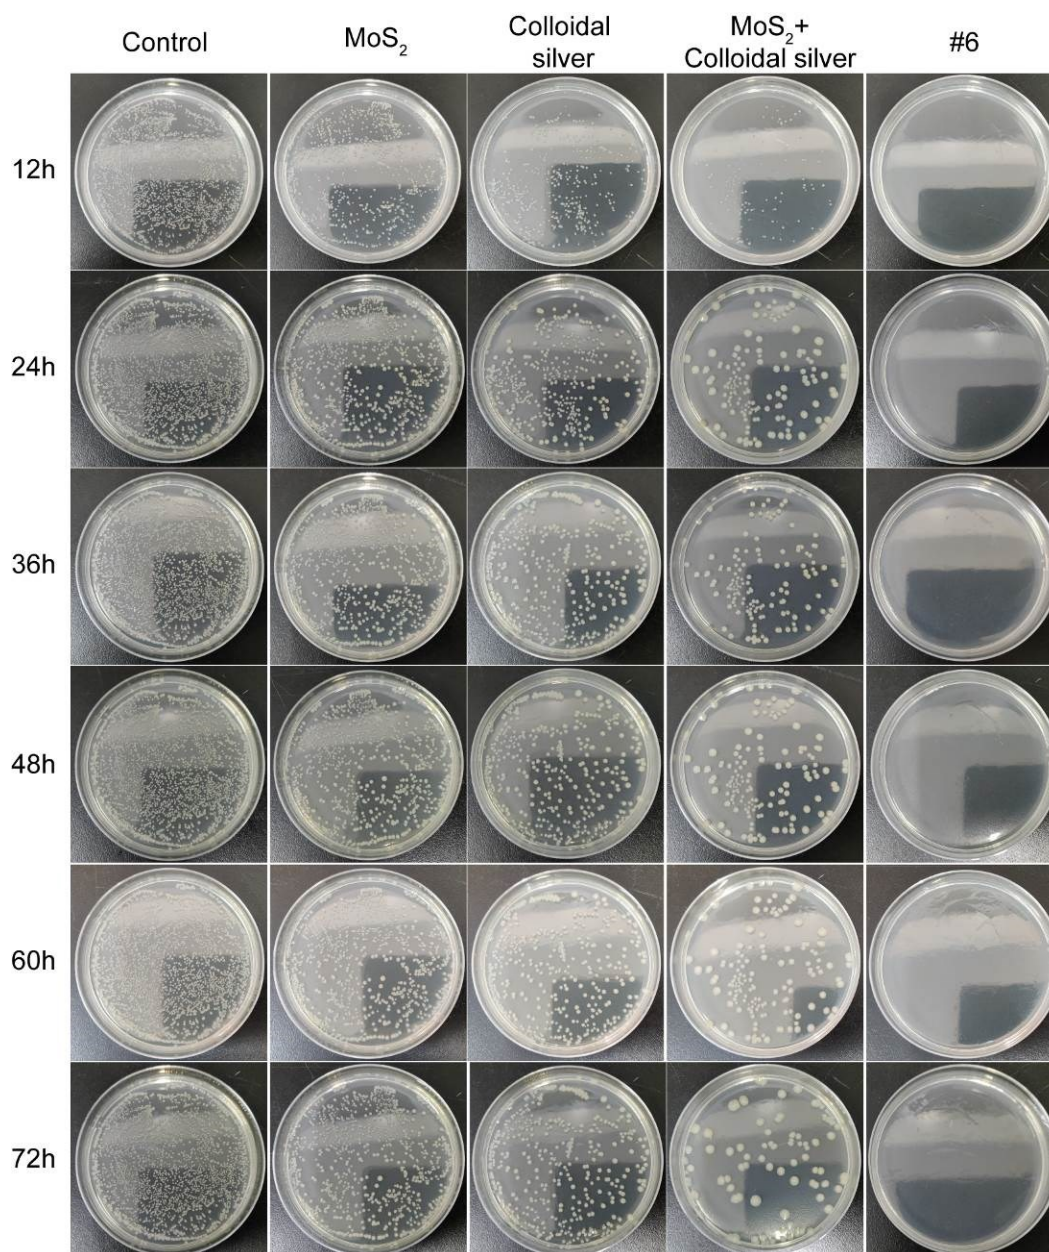

**Figure S4.** The optical images of the long-term antibacterial effect of samples including #6 (Ag@MoS<sub>2</sub>#6), MoS<sub>2</sub>, colloidal silver and MoS<sub>2</sub> mixed with colloidal silver.

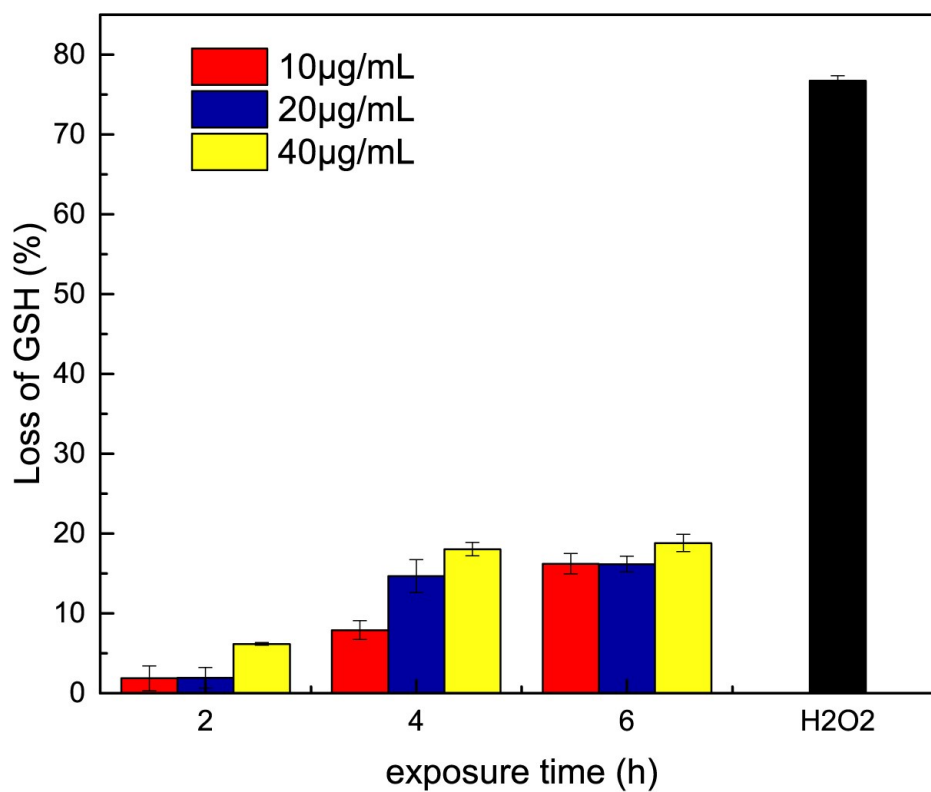

**Figure S5.** Oxidation of glutathione by Ag@ MoS<sub>2</sub>#6. Loss of GSH (0.4 mM) after in vitro incubation Ag@ MoS<sub>2</sub>#6 dispersions with different concentrations for 2, 4 and 6h. H<sub>2</sub>O<sub>2</sub> (1 mM) was used as a positive control. The bicarbonate buffer without MoS<sub>2</sub> materials was used as a negative control.

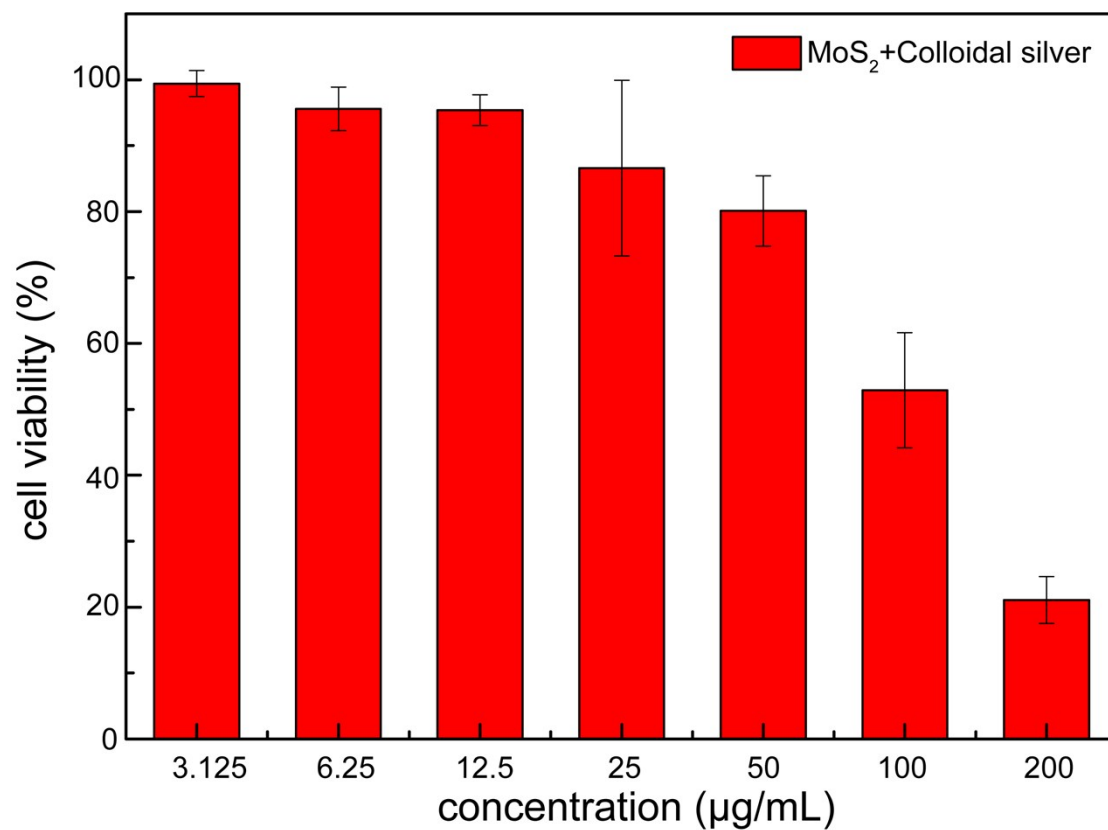

**Figure S6.** The cytotoxicity of MoS<sub>2</sub> mixed with colloidal silver on BEAS-2B cells. Error bars represented standard deviations (n = 3).
